# Supplementary material for: The Effects of the Exposure of Musculoskeletal Tissue to Extracorporeal Shock Waves
Source: MDPI journal article supplement (doi:10.3390/biomedicines10051084), 2022-05-06
Supplement: s1 [file s1]

# **Effects of exposure of musculoskeletal tissue to extracorporeal shock waves**

Tobias Würfel, Christoph Schmitz and Leon L.J. Jokinen

## **Supplementary Material**

**Table S1: effects of the exposure of bone and cartilage tissue to extracorporeal shock waves**

| Reference No. | Author                   | Year | Study type                                 | Utilized device                                                                                                        | Cell type investigated                                                       | Morphological, functional, radiological findings                                                                                                                                                                                    | Findings of molecularbiological examinations                                                                                                                                                                                                                                                   | Findings of histological examinations                                                                                                                                                                                                                                                                                                   |
|---------------|--------------------------|------|--------------------------------------------|------------------------------------------------------------------------------------------------------------------------|------------------------------------------------------------------------------|-------------------------------------------------------------------------------------------------------------------------------------------------------------------------------------------------------------------------------------|------------------------------------------------------------------------------------------------------------------------------------------------------------------------------------------------------------------------------------------------------------------------------------------------|-----------------------------------------------------------------------------------------------------------------------------------------------------------------------------------------------------------------------------------------------------------------------------------------------------------------------------------------|
| [18]          | Li et al.                | 2021 | Primary cell culture + animal experiment   | Epos Ultra, Dornier MedTech, Wessling, Germany                                                                         | Rabbit femur BMSC                                                            | Increased mineral apposition rates, trabecular bone volume, number, thickness; decreased trabecular separation                                                                                                                      | Increased expression of ALP, OCN, RUNX2, OPG /// SMAD2                                                                                                                                                                                                                                         |                                                                                                                                                                                                                                                                                                                                         |
| [19]          | Inoue et al.             | 2021 | Animal experiment                          | Physio ShockMaster, SAKAI Medical Co., Ltd., Tokyo, Japan                                                              | Rat osteoporotic model                                                       | Increased trabecular bone microarchitecture and bone strength                                                                                                                                                                       | Decreased RANKL                                                                                                                                                                                                                                                                                |                                                                                                                                                                                                                                                                                                                                         |
| [20]          | Inoue et al.             | 2021 | Animal experiment                          | Physio ShockMaster, SAKAI Medical Co., Ltd., Tokyo, Japan                                                              | Rat osteoporotic fracture models                                             | Increased bone volume/tissue volume                                                                                                                                                                                                 |                                                                                                                                                                                                                                                                                                | Increased osteoblast surface, decreased number of sclerostin positive osteocytes                                                                                                                                                                                                                                                        |
| [21]          | Zhao et al.              | 2021 | Primary cell culture + animal experiment   | Swiss DolorClast Master (Electro Medical Systems SA, Switzerland).                                                     | Human SBC-SPCs // rabbit osteochondral injury model                          |                                                                                                                                                                                                                                     | Unaltered expression of OCN, RUNX2, COL2, SOX9; decreased expression of CEBPa and PPARy; increased expression of YAP                                                                                                                                                                           | Increased proliferation                                                                                                                                                                                                                                                                                                                 |
| [22]          | Kobayashi et al.         | 2020 | Animal experiment + secondary cell culture | Duolith® SD1-Storz Medical AG, Tagerwilen, Switzerland                                                                 | Rat femur delayed union // ATDC5 cells                                       | Increased bone union rate, radiographic score                                                                                                                                                                                       |                                                                                                                                                                                                                                                                                                | Increased enchondral ossification, chondrogenic differentiation without inhibiting proliferation                                                                                                                                                                                                                                        |
| [23]          | Alshihri et al.          | 2020 | Primary cell culture                       | PiezoClast EMS, RICHARD WOLF GmbH, Knittingen, Germany                                                                 | Goat iliac crest BMSC                                                        |                                                                                                                                                                                                                                     |                                                                                                                                                                                                                                                                                                | Unaltered cell migration; increased proliferation and osteogenic differentiation                                                                                                                                                                                                                                                        |
| [24]          | Hsu et al.               | 2020 | Animal experiment                          | Duolith® SD1-Storz Medical AG, Tagerwilen, Switzerland                                                                 | Rat osteoporotic model                                                       | Increased bone strenght, bone mineral density, trabecular thickness, bone volume/tissue volume, porosity                                                                                                                            |                                                                                                                                                                                                                                                                                                | Increased expression of BMP2, BMP4, and Wnt3a signaling; unaltered expression of IGF1                                                                                                                                                                                                                                                   |
| [25]          | Ramesh et al.            | 2020 | Animal experiment                          | Radial Spec., Medi Spec., Gaithersburg, MD, USA                                                                        | Cultured fetal rat metatarsal bones                                          | Increased bone length                                                                                                                                                                                                               |                                                                                                                                                                                                                                                                                                | Increased number of proliferative chondrocytes of growth plate's cartilage and diameter of hypertrophic chondrocytes; activation of IGF1 and NFkb; increased levels of Bcl2 and Bcl-xl                                                                                                                                                  |
| [26]          | Colbath et al.           | 2020 | Primary cell culture                       | Pulse Veterinary Technologies, LLC                                                                                     | Equine BMSC                                                                  |                                                                                                                                                                                                                                     | Increased expression of ALP, decreased expression of TGFb, VEGF                                                                                                                                                                                                                                |                                                                                                                                                                                                                                                                                                                                         |
| [27]          | Hashimoto et al.         | 2019 | Animal experiment                          | Dornier MedTech; Dornier ARIES Vet                                                                                     | Rat meniscus model                                                           |                                                                                                                                                                                                                                     | Increased expression of COL2a1, ACAN, CCN2, SOX9                                                                                                                                                                                                                                               | Increased meniscal healing score and BrdU/CCN2-ratio                                                                                                                                                                                                                                                                                    |
| [28]          | Senel et al.             | 2019 | Animal experiment                          | Orthogold 100, MTS Medical, Konstanz, Germany                                                                          | Rabbit osteotomy model                                                       | Bone mineral density, bone mineral content                                                                                                                                                                                          |                                                                                                                                                                                                                                                                                                |                                                                                                                                                                                                                                                                                                                                         |
| [29]          | Kim et al.               | 2019 | Primary cell culture + animal experiment   | Dornier AR2 electromagnetic head applicator                                                                            | Rat chondrocytes // rat temporomandibular joint osteoarthritis model         | Increased structure and bone quality                                                                                                                                                                                                | Decreased expression of TNFa, IL1b, IL6, MMP3, MMP13, BMP7                                                                                                                                                                                                                                     | Increased cell viability; decreased number of apoptotic cells and pro-inflammatory, cartilage degradation markers                                                                                                                                                                                                                       |
| [30]          | Buarque de Gusmao et al. | 2019 | Animal experiment                          | Evoltron, SwiTech Medical AG, Kreuzlingen, Switzerland (fok.) // MP 100, Storz Medical, Tagerwilen, Switzerland (rad.) | Rat tibial defects                                                           |                                                                                                                                                                                                                                     | rESWT: increased Akt and FAK activity and TGFb1 expression<br>rESWT: increased FAK activity, decreased FAK activity                                                                                                                                                                            |                                                                                                                                                                                                                                                                                                                                         |
| [31]          | Cheng et al.             | 2019 | Animal experiment                          | Duolith® SD1-Storz Medical AG, Tagerwilen, Switzerland                                                                 | Rat knee osteoarthritis model: subchondral bone / articular cartilage        | Enhanced bone volume and trabecular thickness                                                                                                                                                                                       |                                                                                                                                                                                                                                                                                                | Reduced synovitis and cartilage damage, decreased expression of MMP-13, enhanced expression of RUNX-2, SOX-9 and Collagen Xa1, enhanced expression of IGF-1, TGF-β1, type II collagen and decreased TUNEL activity                                                                                                                      |
| [32]          | Ginini et al.            | 2019 | Animal experiment                          | Dermagold 100, Tissue Regeneration Technologies, Woodstock, GA, manufactured by MTS, Konstanz, Germany                 | Distraction osteogenesis in rats mandible: ESWT during distraction period    | Increased mineral density, enhanced bone formation                                                                                                                                                                                  |                                                                                                                                                                                                                                                                                                | Higher collagen orientation index, expression of type I collagen and osteocalcin proteins                                                                                                                                                                                                                                               |
| [33]          | Ginini et al.            | 2018 | Animal experiment                          | Dermagold 100, Tissue Regeneration Technologies, Woodstock, GA, manufactured by MTS, Konstanz, Germany                 | Distraction osteogenesis in rats mandible: ESWT during consolidation period  | Higher degree of bone formation and mature bone, increased bone mineral density, bone volume fraction, and trabecular thickness                                                                                                     |                                                                                                                                                                                                                                                                                                | Enhanced expression of bone morphogenetic protein-2, vascular endothelial growth factor, and proliferating cell nuclear antigen                                                                                                                                                                                                         |
| [34]          | Qi et al.                | 2018 | Animal experiment                          | STORZ device (STORZ Medical, Tägerwilen, Switzerland) (radial)                                                         | Treatment of osteochondral defects of rabbit knees with scaffolds            | Improved International Cartilage Repair Society (ICRS) score and macroscopic osteochondral appearance                                                                                                                               |                                                                                                                                                                                                                                                                                                |                                                                                                                                                                                                                                                                                                                                         |
| [35]          | Koolen et al.            | 2018 | Animal experiment                          | Orthogold 180 c; MTS Medical, Konstanz, Germany                                                                        | Screw fixation of rat cortical and cancellous bones                          | Cortical screws: increased bone formation and screw fixation; cancellous screws: no alterations                                                                                                                                     |                                                                                                                                                                                                                                                                                                |                                                                                                                                                                                                                                                                                                                                         |
| [36]          | Mackert et al.           | 2017 | Animal experiment                          | Duolith® SD1-Storz Medical AG, Tagerwilen, Switzerland                                                                 | Osteoporotic fracture of rats tibia                                          | Improved average stiffness and yield load                                                                                                                                                                                           | Increased expression of Collagen 1-alpha-1, Estrogen Receptor-α, Insulin-like Growth Factor 1, Osteocalcin, Tartrate-resistant Acid Phosphatase                                                                                                                                                | Improved average ventral, dorsal and endosteal callus formation                                                                                                                                                                                                                                                                         |
| [37]          | Tan et al.               | 2017 | Primary cell culture                       | KDE-2001 Extracorporeal Shockwave Lithotripter                                                                         | HMSCs under 3D culture conditions                                            |                                                                                                                                                                                                                                     | ESWT alone: increased levels of A2B receptors; ESWT in combination with adenosine and A2BR-agonists downregulated ACAN, COL1A2, COL2A1, SOX9 and SOX6<br>Increased expression of ERK1, OPG, ALP, MMP13; potential activation of the 1α,25-Dihydroxyvitamin D3 Rapid Membrane Signaling Pathway | ESWT + adenosine and A2BR-agonists: inhibited chondrogenic differentiation                                                                                                                                                                                                                                                              |
| [38]          | Hsu et al.               | 2017 | Animal experiment                          | not specified                                                                                                          | Rat knee osteoarthritis model                                                |                                                                                                                                                                                                                                     |                                                                                                                                                                                                                                                                                                | Increased expression of Pdia-3                                                                                                                                                                                                                                                                                                          |
| [39]          | Yilmaz et al.            | 2017 | Animal experiment                          | Duolith® SD1-Storz Medical AG, Tagerwilen, Switzerland                                                                 | Rat knee osteoarthritis model                                                | Increased osteoblastic activity, improved pain score                                                                                                                                                                                |                                                                                                                                                                                                                                                                                                | Lower modified Mankin score                                                                                                                                                                                                                                                                                                             |
| [40]          | Wang et al.              | 2017 | Animal experiment                          | OssaTron (SANUWAVE Health, Inc., Alpharetta, GA)                                                                       | Rat knee osteoarthritis model                                                | Improved OARSI score and gross pathological changes, less cartilage defect, higher bone mineral density and bone volume, improved bone porosity and yield stress                                                                    |                                                                                                                                                                                                                                                                                                | Increased expression PCNA and osteocalcin, decreased expression of TUNEL                                                                                                                                                                                                                                                                |
| [41]          | Chen et al.              | 2017 | Primary cell culture                       | Huikang type IV (Huikang, Shengzhen, China)                                                                            | BMSC in osteogenic medium and implantation in mid-femur bone defects in rats | In vivo: improved bone volume, trabecular volume, BV/TV, bone thickness and bone mineral density                                                                                                                                    | In vitro: increased expression of Col1, Runx2, osterix, and ALP                                                                                                                                                                                                                                | In vitro: enhanced proliferation and osteogenic differentiation; in vivo: increased bone formation and expression of Runx2 and Osterix                                                                                                                                                                                                  |
| [42]          | Onger et al.             | 2017 | Animal experiment                          | OE050 focused applicator, Orthogold 100, MTS, Konstanz, Germany                                                        | Distraction osteogenesis in rats mandible: ESWT during consolidation period  | 500 impulses per treatment: unaltered bone volume/bone density<br>1000 impulses per treatment: enhanced bone volume, bone density                                                                                                   |                                                                                                                                                                                                                                                                                                | 500 impulses per treatment: enhanced capillary volume, decreased connective tissue volume<br>1000 impulses per treatment: enhanced capillary volume more positive areas of staining with VEGF, collagen antibody, BMP7 compared to control, but decreased capillary volume compared to 500 impulses: unaltered connective tissue volume |
| [43]          | Wang et al.              | 2017 | Animal experiment                          | OssaTron (SANUWAVE Health, Inc., Alpharetta, GA)                                                                       | Rat knee osteoarthritis model                                                | Improved OARSI score and gross pathological changes, less cartilage defect, improved BV/TV ratio, improved bone porosity and trabecular thickness                                                                                   |                                                                                                                                                                                                                                                                                                | Decreased expression of TUNEL, higher amount PCNA-positive cells and increased vascular density; increased cartilage thickness and sectional cartilage area, decreased modified Mankin score                                                                                                                                            |
| [44]          | Lama et al.              | 2017 | Animal experiment                          | Duolith® SD1-Storz Medical AG, Tagerwilen, Switzerland                                                                 | Rat osteoporotic model                                                       | Prevention of bone weight reduction and trabecular microarchitecture deterioration; restored serum parameters of alkaline phosphatase, receptor activator of nuclear factor kappa-B ligand, osteoprotegerin, and PTH due to illness | Reduced cathepsin k, TNF-α levels, PPARy and adiponectin transcription; increased runt-related transcription factor 2 and bone morphogenetic-2 expression                                                                                                                                      |                                                                                                                                                                                                                                                                                                                                         |
| [45]          | Catalano et al.          | 2017 | Primary cell culture                       | Piezosan 100, Richard Wolf, Knittingen, Germany                                                                        | Human adipose-derived mesenchymal stem cells                                 |                                                                                                                                                                                                                                     | Increased ERK phosphorylation, ROS formation, RUNX2, ALP, BMP2                                                                                                                                                                                                                                 | Increased Smad phosphorylation                                                                                                                                                                                                                                                                                                          |

**Table S1: effects of the exposure of bone and cartilage tissue to extracorporeal shock waves**

| Reference No. | Author                 | Year | Study type             | Utilized device                                                                                        | Cell type investigated                                                               | Morphological, functional, radiological findings                                                                                                                                                                                                                                                     | Findings of molecularbiological examinations                                                                                                                                               | Findings of histological examinations                                                                                                                                                                                          |
|---------------|------------------------|------|------------------------|--------------------------------------------------------------------------------------------------------|--------------------------------------------------------------------------------------|------------------------------------------------------------------------------------------------------------------------------------------------------------------------------------------------------------------------------------------------------------------------------------------------------|--------------------------------------------------------------------------------------------------------------------------------------------------------------------------------------------|--------------------------------------------------------------------------------------------------------------------------------------------------------------------------------------------------------------------------------|
| [46]          | Ma et al.              | 2017 | Animal experiment      | Orthospec (Medispec, Galthersburg, MD, USA)                                                            | Rabbit necrotic femoral head model                                                   | Higher bone volume per tissue volume, trabecular thickness, trabecular number, osteoblast surface/bone surface, osteoid surface/bone surface, osteoid thickness, mineralizing surface/bone surface, mineralizing apposition rate, and bone formation rate as well as a reduced trabecular separation |                                                                                                                                                                                            |                                                                                                                                                                                                                                |
| [47]          | Huang et al.           | 2016 | Animal experiment      | Orthospec™ (Medispec, Israel)                                                                          | Osteoporotic fracture of rats tibia                                                  |                                                                                                                                                                                                                                                                                                      | Increased expression of osteoprotegerin and bone morphogenetic protein-2                                                                                                                   |                                                                                                                                                                                                                                |
| [48]          | Notarnicola et al.     | 2016 | Primary cell culture   | Minilith SL1 (STORZ, Germany)                                                                          | Human bone marrow stem cells                                                         |                                                                                                                                                                                                                                                                                                      | Increased expression of BMP, alkaline phosphatase, osteocalcin, COL1A1 and RUNX2                                                                                                           | Enhanced cell adhesion and proliferation                                                                                                                                                                                       |
| [49]          | Zhai et al.            | 2016 | Primary cell culture   | MFL 5000 Lithotripter, Dornier Medizintechnik, Wessling, Germany                                       | Human bone mesenchymal stem cells from patients with avascular femoral head necrosis |                                                                                                                                                                                                                                                                                                      | Increased expression of osteocalcin (OCN), core binding factor $\alpha 1$ (Cbfa1) and decreased peroxisome proliferator-activated receptor $\gamma$                                        | Increased alkaline phosphatase content                                                                                                                                                                                         |
| [50]          | Dias dos Santos et al. | 2015 | Animal experiment      | EVOTRON-Vet® (SwiTech, Switzerland)                                                                    | Bone drilled femurs of rats                                                          |                                                                                                                                                                                                                                                                                                      | Increased contents of sulfated glycosaminoglycans and hyaluronic acid                                                                                                                      |                                                                                                                                                                                                                                |
| [51]          | Wang et al.            | 2014 | Animal experiment      | OssaTron (SANUWAVE Health, Inc., Alpharetta, GA)                                                       | Rat osteoporosis and/or osteoarthritis model                                         | Reduced arthritic area of injury joint, enhanced BMD and bone strength, improved subchondral plate thickness and bone porosity, reduced cartilage damage                                                                                                                                             |                                                                                                                                                                                            | Increased Mankin and safranin O score, improved alterations of the molecular levels due to the illness of Dickkopf-1 (DKK-1), PCNA, VEGF, and BMP-2                                                                            |
| [52]          | Muzio et al.           | 2014 | Secondary cell culture | Piezoson 100, Richard Wolf, Knittlingen, Germany                                                       | Blocking of BMP of ESW-treated human osteoblast-like cells                           |                                                                                                                                                                                                                                                                                                      | Decreased alkaline phosphatase and osteocalcin                                                                                                                                             | Increased cell growth                                                                                                                                                                                                          |
| [53]          | Oktas et al.           | 2014 | Animal experiment      | Stonelith PCK® lithotripter (Turkey, Ankara)                                                           | Fractures with both intact periosteum and excised periosteum in rats                 | No radiologic differences                                                                                                                                                                                                                                                                            |                                                                                                                                                                                            | Excised periosteum group: positive effect on bone healing                                                                                                                                                                      |
| [54]          | Sun et al.             | 2013 | Primary cell culture   | KDE-2001 Extracorporeal Shockwave Lithotripter                                                         | Osteogenic differentiation of human bone marrow mesenchymal stem cells               |                                                                                                                                                                                                                                                                                                      | Shockwave-dependent ATP release, that activated P2X7 receptors and downstream signaling events, which induced the differentiation                                                          |                                                                                                                                                                                                                                |
| [55]          | Suhr et al.            | 2013 | Primary cell culture   | Duolith®SD1 (Storz Medical AG, Trägenwilen, Switzerland)                                               | Human bone marrow stromal cells                                                      |                                                                                                                                                                                                                                                                                                      |                                                                                                                                                                                            | Extended growth rate, proliferation, migration, cell tracking and wound healing; ameliorated cell migration mediated by active remodeling of the actin cytoskeleton as indicated by increased directed stress fiber formations |
| [56]          | Lyon et al.            | 2013 | Animal experiment      | not specified                                                                                          | Osteochondrosis dissecans of rabbit knees                                            | Increased bony density                                                                                                                                                                                                                                                                               |                                                                                                                                                                                            | More mature bone formation, better healing, higher density of the cartilage                                                                                                                                                    |
| [57]          | Wang et al.            | 2013 | Animal experiment      | OssaTron (SANUWAVE Health, Inc., Alpharetta, GA)                                                       | Rat knee osteoarthritis model                                                        | Increased bone mineral density                                                                                                                                                                                                                                                                       |                                                                                                                                                                                            | Improved Makin and Safranin O score, increased collagen II, decreased MMP13                                                                                                                                                    |
| [58]          | Wang et al.            | 2013 | Animal experiment      | OssaTron (SANUWAVE Health, Inc., Alpharetta, GA)                                                       | Rat knee osteoarthritis model                                                        |                                                                                                                                                                                                                                                                                                      |                                                                                                                                                                                            | Treatment 1-2 times per week: improved Makin and Safranin O score, increased collagen II, decreased MMP13, increased vWF, VEGF, BMP-2 and osteocalcin; deteriorated effects after 3 treatments per week                        |
| [59]          | van der Jagt et al.    | 2013 | Animal experiment      | Dermagold, Tissue Regeneration Technologies, Woodstock, GA, manufactured by MTS, Konstanz, Germany     | Rat osteoporotic model                                                               | Increased cortical volume (CTV), higher trabecular connectivity and, more plate like and thicker trabeculae, increased trabecular bone volume fraction                                                                                                                                               |                                                                                                                                                                                            |                                                                                                                                                                                                                                |
| [60]          | Oztemur et al.         | 2013 | Animal experiment      | Storz Masterpuls MP200 (STORZ, Germany)                                                                | Immature epiphysis of rats                                                           | No changes in bone length                                                                                                                                                                                                                                                                            |                                                                                                                                                                                            | Increased blood vessel density, highly basophilic matrix and abundance of the differentiating chondrocytes                                                                                                                     |
| [61]          | Gollwitzer et al.      | 2013 | Animal experiment      | Swiss Dolorclast® (Electro Medical Systems SA, Switzerland)                                            | Rabbit femurs                                                                        | New bone formation                                                                                                                                                                                                                                                                                   |                                                                                                                                                                                            |                                                                                                                                                                                                                                |
| [62]          | Altuntas et al.        | 2012 | Animal experiment      | Storz Masterpuls MP200 (STORZ, Germany)                                                                | Rat subcondylar mandibular fracture model                                            |                                                                                                                                                                                                                                                                                                      |                                                                                                                                                                                            | Higher specimens' mean score in bone fracture healing                                                                                                                                                                          |
| [63]          | Notarnicola et al.     | 2012 | Primary cell culture   | enPuls, Zimmer MedizinSysteme GmbH, Germany                                                            | Murine calvaria osteoblasts                                                          |                                                                                                                                                                                                                                                                                                      | Reduction in type 1 collagen, osteix, bone sialoprotein and receptor activator NF kappa ligand expression, osteocalcin, and osteopontin; in summary: inhibing effect on osteoclastogenesis |                                                                                                                                                                                                                                |
| [64]          | Zhao et al.            | 2012 | Animal experiment      | Swiss Dolorclast® (Electro Medical Systems SA, Switzerland)                                            | Rabbit knee osteoarthritis model                                                     | Decreased NO level, and severity of cartilage lesions                                                                                                                                                                                                                                                |                                                                                                                                                                                            | Decreased chondrocyte apoptosis, enhanced Mankin score                                                                                                                                                                         |
| [65]          | Kearney et al.         | 2012 | Animal experiment      | OssaTron (SANUWAVE Health, Inc., Alpharetta, GA)                                                       | Rabbit tibia                                                                         |                                                                                                                                                                                                                                                                                                      |                                                                                                                                                                                            | Increased cambium cell number, cambium cell thickness, osseous tissue and callus area, larger amount of osteoprogenitor tissue; improved results in combination with a bioactive scaffold                                      |
| [66]          | Xu et al.              | 2012 | Primary cell culture   | Huikang type IV (Huikang, Shengzhen, China)                                                            | Rat osteoblasts                                                                      |                                                                                                                                                                                                                                                                                                      | Promotion of Integrin alpha-5 and beta-1-expression; induction of phosphorylation of the focal adhesion kinase, which led to an increased adhesion and migration of osteoblasts            |                                                                                                                                                                                                                                |
| [67]          | Wang et al.            | 2012 | Animal experiment      | OssaTron (SANUWAVE Health, Inc., Alpharetta, GA)                                                       | Osteoarthritis of rat knees                                                          |                                                                                                                                                                                                                                                                                                      |                                                                                                                                                                                            | Improved Makin and Safranin O score, increased collagen II, VEGF, BMP-2 and osteocalcin expression                                                                                                                             |
| [68]          | Ertürk et al.          | 2012 | Animal experiment      | Multimed Ortho (ElmedElectronics & Medical Industry & Trade Inc., Ankara, Turkey)                      | Intervertebral cartilage endplate in rabbits                                         | No alterations in MRI                                                                                                                                                                                                                                                                                |                                                                                                                                                                                            | Edema, increased fibroblastic activity, neovascularisation                                                                                                                                                                     |
| [69]          | Wang et al.            | 2011 | Animal experiment      | OssaTron (SANUWAVE Health, Inc., Alpharetta, GA)                                                       | Osteoarthritis of rat knees                                                          | Increased BMD, bone strength, modulus of elasticity                                                                                                                                                                                                                                                  |                                                                                                                                                                                            | Decreased Mankin score, improved Safranin O staining results, increased expression of VWF, VEGF, BMP2, OCN, ALP, decreased expression of CTXII, COMP                                                                           |
| [70]          | van der Jagt et al.    | 2011 | Animal experiment      | Dermagold; TissueRegeneration Technologies, Woodstock, Georgia, manufactured by MTS, Konstanz, Germany | Rat tibia                                                                            | Increased 99mTc-MDP uptake, increased trabecular and cortical bone volume, higher bone stiffness; no alterations in microcrack analysis                                                                                                                                                              |                                                                                                                                                                                            | Soft tissue damage, no periostal damage, de novo bone with active osteoblasts and osteoids                                                                                                                                     |
| [71]          | Notarnicola et al.     | 2011 | Primary cell culture   | Minilith SL1 (STORZ, Germany)                                                                          | Murine calvaria osteoblast culture                                                   |                                                                                                                                                                                                                                                                                                      | Increased expression of RUNX2, COL1, OCN, IGF-1, IGFBP-3; decreased expression of IGFBP-4 and -5                                                                                           |                                                                                                                                                                                                                                |
| [72]          | Hausdorf et al.        | 2011 | Secondary cell culture | XL 1 (Dornier MedTech, Wessling, Germany)                                                              | Human osteoblasts and fibroblasts                                                    |                                                                                                                                                                                                                                                                                                      | Increased FGF-2; no significant alterations in TGF-b                                                                                                                                       |                                                                                                                                                                                                                                |
| [73]          | Wang et al.            | 2011 | Animal experiment      | OssaTron (SANUWAVE Health, Inc., Alpharetta, GA)                                                       | Rabbit tibia acute fracture healing model                                            | Increased BMC                                                                                                                                                                                                                                                                                        |                                                                                                                                                                                            | Increased bone tissue, decreased fibrous tissue; increased expression of VEGF, VWF, PCNA, OCN, BMP2, decreased expression of TUNEL                                                                                             |

**Table S1: effects of the exposure of bone and cartilage tissue to extracorporeal shock waves**

| Reference No. | Author                | Year | Study type             | Utilized device                                                                                                                                                             | Cell type investigated                                     | Morphological, functional, radiological findings                                                                                       | Findings of molecularbiological examinations                                                                                                                                                                  | Findings of histological examinations                                                                                                                                                                               |
|---------------|-----------------------|------|------------------------|-----------------------------------------------------------------------------------------------------------------------------------------------------------------------------|------------------------------------------------------------|----------------------------------------------------------------------------------------------------------------------------------------|---------------------------------------------------------------------------------------------------------------------------------------------------------------------------------------------------------------|---------------------------------------------------------------------------------------------------------------------------------------------------------------------------------------------------------------------|
| [74]          | Mayer-Wagner et al.   | 2010 | Animal experiment      | XL 1 (Dornier MedTech, Wessling, Germany)                                                                                                                                   | Rat knee                                                   |                                                                                                                                        | Increased COL2A1 expression                                                                                                                                                                                   | Ultrastructural expansion of the rough-surfaced endoplasmatic reticulum, detachment of the cell membrane and necrotic chondrocytes; increased tenascin-C and $\text{Ch}3\text{L}1$ ; no alterations in Mankin Score |
| [75]          | Muzio et al.          | 2010 | Secondary cell culture | Piezoson 100, Richard Wolf, Knittlingen, Germany                                                                                                                            | Human osteoblast-like cells                                |                                                                                                                                        | Increased expression of ALP, COL1, BMP-4, OCN                                                                                                                                                                 | Increased osteoblast activity as well as number and size of calcium deposits                                                                                                                                        |
| [76]          | Lai et al.            | 2010 | Animal experiment      | OssaTron (High Medical Technology, Kreuzlingen, Switzerland)                                                                                                                | Distraction osteogenesis of rat mandible                   | Treatment with 14kV: increased mineral density, biomechanical bone strength, intense osteoblastic cell recruitment, new bone formation |                                                                                                                                                                                                               | Treatment with 14kV: intense osteoblastic cell recruitment, new bone formation, neovascularisation, increased PCNA, VEGF, BMP-2; opposite effects after treatment with 21kV                                         |
| [77]          | Qin et al.            | 2010 | Animal experiment      | Dornier MedTech Epos, Wessling, Germany                                                                                                                                     | Rabbit osteotendinous junction                             | Higher fraction of new bone                                                                                                            |                                                                                                                                                                                                               | Increased VEGF expression in hypertrophic chondrocytes, promotion of regeneration of the fibrocartilage zone                                                                                                        |
| [78]          | van der Jagt et al.   | 2009 | Animal experiment      | Dermagold/Orthowave 180, Tissue Regeneration Technologies, Woodstock, GA                                                                                                    | Rat tibiae osteoporotic model                              | Diminished bone loss, higher trabecular bone volume fraction                                                                           |                                                                                                                                                                                                               | No differences in mineralization or osteoid appearance                                                                                                                                                              |
| [79]          | Iannone et al.        | 2009 | Primary cell culture   | MINILITH SL1; Storz Medical, Kreuzlinger, Switzerland                                                                                                                       | Human osteoarthritic and healthy osteoblasts               |                                                                                                                                        | Increased expression of IL10, no alterations in TGF $\alpha$ , CD29, CD105 expression                                                                                                                         |                                                                                                                                                                                                                     |
| [80]          | Tamma et al.          | 2009 | Primary cell culture   | MINILITH SL1; Storz Medical, Kreuzlinger, Switzerland                                                                                                                       | Murine calvaria osteoblasts                                |                                                                                                                                        | Increased expression of Bax, RUNX2, OPN, BSP, OCN, COL1, decreased RANKL/OPG-ratio suggesting inhibition of osteoclastogenesis                                                                                |                                                                                                                                                                                                                     |
| [81]          | Lee et al.            | 2009 | Animal experiment      | OssaTron (High Medical Technology, Kreuzlingen, Switzerland)                                                                                                                | Rabbit spinal fusion model                                 | Increased callus formation and both extension and flexion stiffness                                                                    |                                                                                                                                                                                                               |                                                                                                                                                                                                                     |
| [82]          | Tam et al.            | 2009 | Animal experiment      | Epos Ultra with EMSE O-140-AL source, Dornier MedTech, Wessling, Germany                                                                                                    | Calcaneus of ovariectomized goats                          | Enhanced trabecular bone mineral density, trabecular bone volume fraction (BV/TV), trabecular thickness                                |                                                                                                                                                                                                               | Increased mineral apposition rate                                                                                                                                                                                   |
| [83]          | Hofmann et al.        | 2008 | Primary cell culture   | Sonocur Plus device (Siemens AG)                                                                                                                                            | Primary human cancellous bone osteoblasts                  |                                                                                                                                        | Altered expression of several genes involved in bone formation, osteoblast differentiation and skeletal development; no alterations in Runx2, osterix, osteopontin, osteonectin, OC, TGF $\beta$ 1 expression | Enhanced mineralization and number of AP-positive osteoblasts                                                                                                                                                       |
| [84]          | Tam et al.            | 2008 | Primary cell culture   | Dornier MedTech, Wessling, Germany                                                                                                                                          | Human periosteal osteoblasts                               |                                                                                                                                        | Decreased cell viability 6 days after treatment, increased viability 18 days after treatment; increased cell proliferation 18 days after treatment                                                            | Enhanced mineralization 35 days after treatment and AP activity 18 days after treatment                                                                                                                             |
| [85]          | Lee et al.            | 2008 | Animal experiment      | OssaTron (High Medical Technology, Kreuzlingen, Switzerland)                                                                                                                | Rabbits with dissociated transverse processes              | New bone formation                                                                                                                     |                                                                                                                                                                                                               | Superior fusion mass                                                                                                                                                                                                |
| [86]          | Wang et al.           | 2008 | Animal experiment      | OssaTron (Sanuwave, Alpharetta, GA, USA)                                                                                                                                    | Rabbit femur closed fracture model                         | Increased bone strength                                                                                                                |                                                                                                                                                                                                               | Increased cortical bone formation, higher number of neovessels, increased expression of VEGF, eNOS, PCNA, and BMP-2                                                                                                 |
| [87]          | Moretti et al.        | 2008 | Primary cell culture   | MINILITH SL1; Storz Medical, Kreuzlinger, Switzerland                                                                                                                       | Human osteocytes: healthy and osteoarthritic               |                                                                                                                                        | Decreased expression x of IL-10, TNF $\alpha$ in both groups; no alteration in b1-integrin expression                                                                                                         |                                                                                                                                                                                                                     |
| [88]          | Tischer et al.        | 2008 | Animal experiment      | Epos + XL 1 (Dornier MedTech, Wessling, Germany)                                                                                                                            | Rabbit intact femur model                                  | Dose-depending new bone formation                                                                                                      |                                                                                                                                                                                                               | Dose-depending new bone formation                                                                                                                                                                                   |
| [89]          | Ozturk et al.         | 2008 | Animal experiment      | PCK, Stonalith Smart Lithotripter                                                                                                                                           | Rabbit tibia epiphysis                                     |                                                                                                                                        |                                                                                                                                                                                                               | Increased epiphyseal plaque thickness and number of chondrocytes                                                                                                                                                    |
| [90]          | Ma et al.             | 2007 | Animal experiment      | Orthospec (Medispec, MD, USA)                                                                                                                                               | Necrotic femoral head in rabbits                           |                                                                                                                                        | Increased VEGF expression                                                                                                                                                                                     | Increased bone and osteoblast number; increased VEGF expression and microvessel density                                                                                                                             |
| [91]          | Murata et al.         | 2007 | Primary cell culture   | Swiss Dolorclast® (Electro Medical Systems SA, Switzerland)                                                                                                                 | Rabbit chondrocytes                                        |                                                                                                                                        | Augmented uniform gene transfection and increased activity of vector-expressed genes                                                                                                                          |                                                                                                                                                                                                                     |
| [92]          | Benson et al.         | 2007 | Primary cell culture   | pneumatically driven radial shock wave generator (Electro Medical Systems, Dallas, TX, USA)                                                                                 | Equine chondrocytes                                        |                                                                                                                                        | Decreased synthesis of GAG, no alterations in NO or PGE2 synthesis                                                                                                                                            |                                                                                                                                                                                                                     |
| [93]          | Martini et al.        | 2006 | Secondary cell culture | Modulith SLX (Storz Medical AG, Kreuzlingen, Switzerland) + Ossatron (High Medical Technologies AG, Lenzwil, Switzerland)                                                   | Human osteoblast-like cells (MG63)                         |                                                                                                                                        | Dose- and device-dependent cell viability and expression of ALP, C1CP, OCN, TGF $\beta$                                                                                                                       |                                                                                                                                                                                                                     |
| [94]          | Bulut et al.          | 2006 | Animal experiment      | PCK, Stonalith Smart Lithotripter                                                                                                                                           | Rabbits bony nonunion model                                | Increased callus volume                                                                                                                |                                                                                                                                                                                                               | Advanced bone healing                                                                                                                                                                                               |
| [95]          | Martini et al.        | 2005 | Secondary cell culture | Modulith SLX (Storz Medical AG, Kreuzlingen, Switzerland)                                                                                                                   | Human osteoblast-like cells (MG63)                         | Enhanced transmembrane current and voltage dependence of Ca-activated- $\text{K}^+$ -channels                                          |                                                                                                                                                                                                               |                                                                                                                                                                                                                     |
| [96]          | Saisu et al.          | 2005 | Animal experiment      | Piezolith 2300 (Richard Wolf Inc., Knittlingen, Germany)                                                                                                                    | Acetabulum of immature rabbits                             | Increased breadth of the acetabular roof and transient woven bone formation on the lateral margin                                      |                                                                                                                                                                                                               |                                                                                                                                                                                                                     |
| [97]          | Chen et al.           | 2004 | Animal experiment      | Ossatron (HMT High Medical Technologies GmbH, Kreuzlingen, Switzerland)                                                                                                     | Rat segmental defect model                                 |                                                                                                                                        | Increased TGF $\beta$ 1 and VEGF-A expression                                                                                                                                                                 | Increased cell density and cell number of RP59-pos. mesenchymal stem cells, subsequently enhanced differentiation into chondrocytes and osteocytes                                                                  |
| [98]          | Saisu et al.          | 2004 | Animal experiment      | Piezolith 2300 (Richard Wolf Inc., Knittlingen, Germany)                                                                                                                    | Immature rabbit femurs                                     | Enhanced bone mineral content, long-bone length and width                                                                              |                                                                                                                                                                                                               |                                                                                                                                                                                                                     |
| [99]          | Chen et al.           | 2004 | Animal experiment      | Ossatron (HMT High Medical Technologies GmbH, Kreuzlingen, Switzerland)                                                                                                     | Rat segmental defect model                                 |                                                                                                                                        | Increased ALPase, COL1, COL2, OCN expression and [3H]-thymidine uptake, increased expression and phosphorylation of ERK and p38                                                                               | Activated ERK and p38 expression                                                                                                                                                                                    |
| [100]         | Pauwels et al.        | 2004 | Ex vivo                | Equitron (HMT High Medical Technologies, Kreuzlingen, Switzerland) // Swiss Dolorclast Vet (Electro Medical Systems, Dallas, TX, USA)                                       | Equine cortical bone                                       | No alterations in bone elasticity                                                                                                      |                                                                                                                                                                                                               | No histological alterations                                                                                                                                                                                         |
| [101]         | Wang et al.           | 2004 | Primary cell culture   | not specified                                                                                                                                                               | Mesenchymal progenitor cells of human umbilical cord blood |                                                                                                                                        | Induced superoxide production, enhanced TGF $\beta$ 1, RUNX2, OCN and COL1 expression, increased bone alkaline phosphatase activity                                                                           | Increase in bone nodule formations, promotion of the CFU-Stroma formation but not CFU-Mix formation                                                                                                                 |
| [102]         | da Costa Gomez et al. | 2004 | Ex vivo                | Swiss DolorClast Vet Radial ESWT machine (Electro Medical Systems, Dallas, TX) + Equitron focused ESWT machine (High Medical Technologies Health Tronics Inc. Kennesaw, GA) | Ex-vivo metatarsal bones of horses                         |                                                                                                                                        |                                                                                                                                                                                                               | rESWT: increased microcrack length; fESWT: increased microcrack density                                                                                                                                             |
| [103]         | Takahashi et al.      | 2004 | Animal experiment      | Lithotripter A (Dornier MedTech, Munich, Germany)                                                                                                                           | Rat femur shafts                                           | Increased cortical thickening, bone mineral density, bone mineral content                                                              |                                                                                                                                                                                                               | Enhanced expression of COL1A1, COL2A1, OC, OPN, no alterations in expression of COL10A1                                                                                                                             |
| [104]         | Chen et al.           | 2003 | Animal experiment      | Ossatron (HMT High Medical Technologies GmbH, Kreuzlingen, Switzerland)                                                                                                     | Rats segmental femoral defect model                        | Increased callus size and calcium content, bone mineral density                                                                        | Increased AP activity, OCN production, PCNA, TGF $\beta$ 1 and BMP-2 expression                                                                                                                               | Increased bone tissue formation, progressive mesenchymal aggregation, enchondral ossification and hard callus formation                                                                                             |

**Table S1: effects of the exposure of bone and cartilage tissue to extracorporeal shock waves**

| Reference No. | Author           | Year | Study type             | Utilized device                                                         | Cell type investigated                                           | Morphological, functional, radiological findings                                                                                                                              | Findings of molecularbiological examinations                                                                                                                                                                                                                                                                                                                                            | Findings of histological examinations                                                                                                                           |
|---------------|------------------|------|------------------------|-------------------------------------------------------------------------|------------------------------------------------------------------|-------------------------------------------------------------------------------------------------------------------------------------------------------------------------------|-----------------------------------------------------------------------------------------------------------------------------------------------------------------------------------------------------------------------------------------------------------------------------------------------------------------------------------------------------------------------------------------|-----------------------------------------------------------------------------------------------------------------------------------------------------------------|
| [105]         | Martini et al.   | 2003 | Primary cell culture   | Ossatron (HMT High Medical Technologies GmbH, Kreuzlingen, Switzerland) | Primary sheep osteoblasts cultures                               |                                                                                                                                                                               | High intensity treatment (28kV): decreased viability, detrimented cell respiration, depressed ALP and NO synthesis, decresed expression of OCN, TGFb and P1CP; low intensity treatment (14kV) showed contrary effects with increased viability and cell respiration, increased ALP and NO synthesis as well as OCN and P1CP expression; generally negative affection of P1CP production |                                                                                                                                                                 |
| [106]         | Martini et al.   | 2003 | Secondary cell culture | Ossatron (HMT High Medical Technologies GmbH, Kreuzlingen, Switzerland) | Human osteoblastlike cells                                       |                                                                                                                                                                               | Increased NO, OCN, TGFb1 production after low energy application (14kV); decreased cell viability and expression of all examined proteins at high application intensities (28kV)                                                                                                                                                                                                        |                                                                                                                                                                 |
| [107]         | Dorotka et al.   | 2003 | Primary cell culture   | Modulith SLK (Storz Medical AG, Kreuzlingen, Switzerland)               | Human articular chondrocytes and ovine bone marrow stromal cells |                                                                                                                                                                               | Increased cytotoxicity in both chondrocytes and BMSCs at high application intensities (0.17mJ/mm2) compared to lower energy levels and control; unaltered cell proliferation at all energy levels                                                                                                                                                                                       |                                                                                                                                                                 |
| [108]         | Wang et al.      | 2003 | Animal experiment      | Ossatron (HMT High Medical Technologies GmbH, Kreuzlingen, Switzerland) | Rat segmental femoral defect model                               |                                                                                                                                                                               | Increased expression of BMP-2, BMP-3, BMP-4, and BMP-7                                                                                                                                                                                                                                                                                                                                  | Intensive mesenchymal cell aggregation, hypertrophic chondrogenesis, and endochondral/intramembrane ossification; increased levels of PCNA, BMP-2, BMP-3, BMP-4 |
| [109]         | Maier et al.     | 2002 | Animal experiment      | Epos Ultra (Dornier MedTech, Wessling, Germany)                         | Intact distal rabbit femur                                       | Scintigraphic decreased bone metabolism after 10 days, but increased metabolism after 28 days; signs of soft-tissue oedema, epiperiosteal fluid and bone-marrow oedema on MRI |                                                                                                                                                                                                                                                                                                                                                                                         | Epiperiosteal deposits of hemosiderin                                                                                                                           |
| [110]         | Wang et al.      | 2002 | Animal experiment      | Ossatron (HMT High Medical Technologies GmbH, Kreuzlingen, Switzerland) | Rat femur bone-marrow stromal cells                              |                                                                                                                                                                               | Increased AP activity and TGFb1 expression                                                                                                                                                                                                                                                                                                                                              | Promotion of bone marrow stromal, but not hematopoetic cell growth; dose-dependent effect on formation of CFU-osteoprogenitors                                  |
| [111]         | Wang et al.      | 2001 | Secondary cell culture | Ossatron (HMT High Medical Technologies GmbH, Kreuzlingen, Switzerland) | Human bone marrow stromal cells                                  |                                                                                                                                                                               | Induction of cell membran hyperpolarization and consecutive Ras-activation, induction of osteogenic transcription factor CBFA1, increased activity of bone alkalaine posphatase, increased expression of OCN, COL-1                                                                                                                                                                     | Increased bone nodule formations                                                                                                                                |
| [112]         | Wang et al.      | 2001 | Animal experiment      | Ossatron (HMT High Medical Technologies GmbH, Kreuzlingen, Switzerland) | Dog tibia fracture model                                         | More callus formations                                                                                                                                                        |                                                                                                                                                                                                                                                                                                                                                                                         | More cortical bone and thicker, denser, and heavier bone tissues                                                                                                |
| [113]         | Väterlein et al. | 2000 | Animal experiment      | Osteostar (Siemens,Erlangen, Germany)                                   | Rabbit femur joint cartilage                                     | Neither macroscopic nor radiological alterations after high intensity treatments                                                                                              |                                                                                                                                                                                                                                                                                                                                                                                         | No histological alterations after high intensity treatments                                                                                                     |
| [114]         | Peters et al.    | 1998 | Primary cell culture   | Siemens Lithostar Plus (Siemens, Erlangen, Germany)                     | Embryos of Oryzias latipes                                       |                                                                                                                                                                               |                                                                                                                                                                                                                                                                                                                                                                                         | Several damages of tissues after low intensity treatment                                                                                                        |
| [115]         | Augat et al.     | 1995 | Animal experiment      | XL2, Dornier Medical Systems, Munich, Germany                           | Ovine tibia fracture model                                       | Neither alterations in biomechanical outcomes nor altered radiological results; tendency to deterioration of fracture healing with increasing application intensities         |                                                                                                                                                                                                                                                                                                                                                                                         |                                                                                                                                                                 |
| [116]         | Forriol et al.   | 1994 | Animal experiment      | Osteostar (Siemens,Erlangen, Germany)                                   | Osteotomized lambs tibia                                         | No effect on the periosteal surface of mature cortical bone, but on the endosteal surface induction of some new trabecular bone, delayed bone healing                         |                                                                                                                                                                                                                                                                                                                                                                                         |                                                                                                                                                                 |
| [6]           | Graff et al.     | 1988 | Animal experiment      | Dornier HM3 (Dornier Medical Systems, Munich, Germany)                  | Rabbit femur                                                     | Soft tissue bleeding                                                                                                                                                          |                                                                                                                                                                                                                                                                                                                                                                                         | Bone marrow hemorrhage and osteocyte damage 48h after ESWT; increased callus and bone formation, focal regeneration, apposition of new bone, bone remodeling    |

## Table S2: effects of the exposure of connective tissue to extracorporeal shock waves

| Reference No. | Author                        | Year | Study type              | Utilized device                                                                                        | Cell type investigated                                                      | Morphological, functional, radiological findings                                          | Findings of molecularbiological examinations                                                                                                                                                                                   | Findings of histological examinations                                                                                                                                                  |
|---------------|-------------------------------|------|-------------------------|--------------------------------------------------------------------------------------------------------|-----------------------------------------------------------------------------|-------------------------------------------------------------------------------------------|--------------------------------------------------------------------------------------------------------------------------------------------------------------------------------------------------------------------------------|----------------------------------------------------------------------------------------------------------------------------------------------------------------------------------------|
| [117]         | Haberal et al.                | 2021 | Animal experiment       | Storz Masterpuls MP100 (STORZ, Germany)                                                                | Rat post-laminectomy                                                        |                                                                                           |                                                                                                                                                                                                                                | Decreased epidural fibrosis; unaltered acute/chronic inflammation and vascular proliferation                                                                                           |
| [118]         | Heimes et al.                 | 2020 | Fertilized Chicken Eggs | Swiss Dolorclast® (Electro Medical Systems SA, Switzerland)                                            | Fertilized chicken eggs.CAM-Assay                                           |                                                                                           | Increased expression of MMP-9; decreased expression of MMP-13; unaltered expression of iNOS2, HIF-1 $\alpha$ , VEGF                                                                                                            | Increased coverage of the transplant by vasculature, percentage of the vascularized area, increase of the vascularized area and number of vessel junctions                             |
| [119]         | Lu et al.                     | 2020 | Primary cell culture    | Duolith®SD1 (Storz Medical AG, Trärgewilen, Switzerland)                                               | Human ACL remnant cells + BMSC                                              |                                                                                           | Increased ACL remnant cell viability; BMSC: increased expression of Ki67, COL1, COL3, unaltered expression of TGF $\beta$ , VEGF                                                                                               | ACL-cells: increased expression of COL-1 A1, TGF- $\beta$ and VEGF BMSC: increased migration and expression of EdU, COL1, COL3; unaltered expression of VEGF, TGF $\beta$              |
| [120]         | Basoli et al.                 | 2020 | Secondary cell culture  | Orthogold 100, MTS Medical, Konstanz, Germany                                                          | Human foreskin fibroblasts                                                  |                                                                                           | Increased proliferation, ATP release, ROS production, expression of IL8, MCP1, HSP90, HSP27; unaltered expression of IL-6                                                                                                      |                                                                                                                                                                                        |
| [121]         | Schnurrer-Luke-Vrbanić et al. | 2018 | Animal experiment       | Swiss Dolorclast® / Piezoclast® (Electro Medical Systems SA, Switzerland)                              | Soft tissue regeneration in a rat fibula fracture model                     |                                                                                           |                                                                                                                                                                                                                                | Higher multiplication of collagen fibers; faster organisation of muscle fibers and vascularization by treatment with radial shockwaves                                                 |
| [122]         | Cui et al.                    | 2018 | Primary cell culture    | Duolith®SD1 (Storz Medical AG, Trärgewilen, Switzerland)                                               | Human hypertrophic scar tissue fibroblasts                                  |                                                                                           | Decreased expression of TGF $\beta$ , $\alpha$ -SMA, vimentin, COL1 $\alpha$ 1, N-Cad, twist; increased expression of ID1, ID2, E-cad, FN after 24h, but decreased expression of FN after 72h                                  | Decreased cell migration                                                                                                                                                               |
| [123]         | Cai et al.                    | 2016 | Primary cell culture    | Dermagold 100, Tissue Regeneration Technologies, Woodstock, GA, manufactured by MTS, Konstanz, Germany | Human periodontal ligament fibroblasts                                      |                                                                                           | Initial decreased of IL-6, IL-8, MCP-1, TNF- $\alpha$ ; after 4 and more hours: increase of IL6 and IL8, unaltered expression of MCP-1, TNF- $\alpha$                                                                          |                                                                                                                                                                                        |
| [124]         | Hochstrasser et al.           | 2016 | Secondary cell culture  | Swiss Dolorclast® (Electro Medical Systems SA, Switzerland)                                            | Human foreskin fibroblasts // human placental choriocarcinoma cells (JEG-3) |                                                                                           | Induced mechanical cell distruption, dose-dependent decreased cell viability, increased growth potential of fibroblasts (not of JEG-3 cells), shift in proportion from G0/G1 to G2/M phase in fibroblasts (not in JEG-3 cells) | Cellular detachments, holes in monolayers, disruption of actin filaments                                                                                                               |
| [125]         | Leone et al.                  | 2016 | Primary cell culture    | Modulith SLK (Storz Medical AG, Kreuzlingen, Switzerland)                                              | Human Tendon-derived Stem/Progenitor cells (hTSPCs)                         |                                                                                           | Increased expression of COL2A, SOX9, ALP, PPAR $\gamma$ ; unaltered expression of BGLAP, RUNX2                                                                                                                                 | Increased expression of differentiation markers in cells grown in specific differentiation media                                                                                       |
| [126]         | Kisch et al.                  | 2015 | Animal experiment       | Duolith®SD1 (Storz Medical AG, Trärgewilen, Switzerland)                                               | Skin of the contralateral leg to the treated side in rats                   | Increased capillary blood velocity; unaltered postcapillary venous filling pressure       |                                                                                                                                                                                                                                |                                                                                                                                                                                        |
| [127]         | Waugh et al.                  | 2015 | Human experiment        | Swiss Dolorclast® (Electro Medical Systems SA, Switzerland)                                            | Microdialysate from peri-tendinous tissue                                   |                                                                                           | Increased expression of IL-6, IL-8, MMP2 complex and ProMMP9; unaltered expression of (IL-1 $\beta$ , IL-2, IL-4, IL-10, IL-12p70, IL-17A, VEGF, interferon- $\gamma$ , Active MMP9, ProMMP2 and Active MMP2                   |                                                                                                                                                                                        |
| [128]         | de Girolamo et al.            | 2014 | Primary cell culture    | Orthogold 100, MTS Medical, Konstanz, Germany                                                          | Human tendon cells                                                          |                                                                                           | Increased expression of SCX, IL-1 $\beta$ , IL-6, IL-10, TGF $\beta$ , VEGF; unaltered expression of MMP-3, MMP-13, COL1 A1, COL3 A1, and TNF $\alpha$ ; reduced NO synthesis                                                  |                                                                                                                                                                                        |
| [129]         | Chow et al.                   | 2014 | Animal experiment       | Epos (Dornier MedTech, Wessling, Germany)                                                              | Rabbit delayed tendon bone insertion healing                                |                                                                                           |                                                                                                                                                                                                                                | Increased fibrocartilage area and thickness, proteoglycan deposition, expression of SOX9, COLII, Vickers hardness; unaltered expression of COL1                                        |
| [130]         | Cinar et al.                  | 2013 | Animal experiment       | Swiss Dolorclast® (Electro Medical Systems SA, Switzerland)                                            | Rat Achilles tendinitis                                                     | Decreased Load to failure                                                                 |                                                                                                                                                                                                                                | Decreased collagen fiber density                                                                                                                                                       |
| [131]         | Contaldo et al.               | 2012 | Animal experiment       | Swiss Dolorclast® (Electro Medical Systems SA, Switzerland)                                            | Mice wound healing model                                                    |                                                                                           |                                                                                                                                                                                                                                | Enhanced expression of caspase-3, PCNA, eNOS; increase of functional angiogenetic density and total wound score                                                                        |
| [132]         | Chow et al.                   | 2012 | Animal experiment       | Epos (Dornier MedTech, Wessling, Germany)                                                              | Rabbit delayed tendon bone insertion healing                                | Increased Load to failure, new bone area and new bone volume                              |                                                                                                                                                                                                                                | Increased fibrocartilage zone and ratio of bone forming                                                                                                                                |
| [133]         | Yoo et al.                    | 2012 | Animal experiment       | Dornier AR2 (Dornier MedTech, Wessling, Germany)                                                       | Rat collagenase-induced achilles tendinitis                                 |                                                                                           |                                                                                                                                                                                                                                | Increased fibrillary diameter, vascularity, fibroblast activity, lymphocyte and plasma cell infiltration, dense histocytes; transient disorganization of collagen fibers               |
| [134]         | Leone et al.                  | 2012 | Primary cell culture    | Modulith SLK (Storz Medical AG, Kreuzlingen, Switzerland)                                              | Human ruptured / healthy tenocytes                                          |                                                                                           | Ruptured tenocytes: decreased expression of COL1, SCX; unaltered COL3, TNM, TN-C                                                                                                                                               | Healthy tenocytes: increased cell proliferation and migration                                                                                                                          |
| [135]         | Zhang et al.                  | 2011 | Animal experiment       | OssaTron + EvoTron (SANUWAVE, Alpharetta, GA, USA)                                                     | Rat various tendons and septa                                               |                                                                                           |                                                                                                                                                                                                                                | Increased lubricine expression                                                                                                                                                         |
| [136]         | Penteado et al.               | 2011 | Animal experiment       | OssaTron® (Barueri, SP, Brazil)                                                                        | Rabbit Patellar tendon                                                      |                                                                                           |                                                                                                                                                                                                                                | Unaltered blood vessel number                                                                                                                                                          |
| [137]         | Kubo et al.                   | 2010 | Animal experiment       | Medispec Ltd, Germantown, Md                                                                           | Rabbit ear lymphedema                                                       | Reduced ear thickness                                                                     | Increased expression of VEGF-C, VEGF-R3                                                                                                                                                                                        | Increased density of lymphatic vessels                                                                                                                                                 |
| [138]         | Sugioka et al.                | 2010 | Primary cell culture    | Swiss Dolorclast® (Electro Medical Systems SA, Switzerland)                                            | Rat Achilles tendon cells                                                   |                                                                                           |                                                                                                                                                                                                                                | Increased introduction of NF- $\kappa$ B decoy-FITC, activation of NF- $\kappa$ B; decreased activation of NF- $\kappa$ B after pretreatment with ESW+NF- $\kappa$ B decoy-FITC        |
| [139]         | Berta et al.                  | 2009 | Secondary cell culture  | Piezoson 100, Richard Wolf, Knittlingen, Germany                                                       | Human fibroblasts                                                           |                                                                                           | Decreased viability; increased expression of TGF- $\beta$ 1; increase of COL1 and COL3 expression after 6 days after a primary decreased expression                                                                            |                                                                                                                                                                                        |
| [140]         | Bosch et al.                  | 2009 | Animal experiment       | Equitron, High Medical Technologies, Lengwil, Switzerland                                              | Various pony tendons                                                        |                                                                                           | Increased expression of COL1 and MMP14; decreased expression of MMP3                                                                                                                                                           | Unaltered total collagen content, disorganization of normal collagen structure; decreased percentage of degraded collagen 6 weeks after treatment after an increase 3h after treatment |
| [141]         | Han et al.                    | 2009 | Primary cell culture    | Sonocur (Siemens Medical Solutions, Iselin, NJ)                                                        | Healthy and diseased tenocytes                                              |                                                                                           | Healthy: increased expression of IL1; unaltered expression of MMP1, MMP2, MMP9, MMP13, IL6 and IL13 diseased: decreased expression of MMP1, MMP13 and IL6; unaltered expression of MMP2, MMP9, IL1 and IL13                    | Decreased cell viability                                                                                                                                                               |
| [142]         | Byron et al.                  | 2009 | Animal experiment       | Swiss DolorClast Vet, EMS Electro Medical Systems, Nyon, Switzerland                                   | Palmar heel pain in horses                                                  | Radiographic scores, scintigraphic navicular pool phase, delayed phase ROI density ratios |                                                                                                                                                                                                                                |                                                                                                                                                                                        |
| [143]         | Chao et al.                   | 2008 | Primary cell culture    | Dornier Electromagnetic Shock Wave Emitter (EMSE 220F; Dornier MedTech GmbH, Wessling, Germany)        | Rat tenocytes                                                               |                                                                                           | Increased total collagen concentration, NO production, expression of PCNA, COL1, COL3, TGF $\beta$                                                                                                                             | Decreased cell viability; increased cell proliferation                                                                                                                                 |
| [144]         | Wang et al.                   | 2008 | Animal experiment       | Epos (Dornier MedTech, Wessling, Germany)                                                              | Rabbit Patella-patellar tendon healing junction                             | Increased new bone formation, bone mineral status, tensile load and strength              |                                                                                                                                                                                                                                | Increased remodeling / alignment of collagen fibers, thicker and mature regenerated fibrocartilage zone                                                                                |
| [145]         | Bosch et al.                  | 2007 | Animal experiment       | Equitron, High Medical Technologies, Lengwil, Switzerland                                              | Various pony tendons                                                        |                                                                                           | Unaltered DNA content, 3h after treatment: increased GAG, total protein synthesis; 6weeks after treatment: decreased GAG, collagen synthesis, noncollagenous protein synthesis, total protein synthesis                        | Unaltered total collagen content, disorganization of normal collagen structure; decreased percentage of degraded collagen 6 weeks after treatment after an increase 3h after treatment |
| [146]         | Kersh et al.                  | 2006 | Animal experiment       | Equitron, High Medical Technologies, Lengwil, Switzerland                                              | Horse superficial digital flexor tendinitis model                           |                                                                                           |                                                                                                                                                                                                                                | Unaltered percentage lesion, percentage disruption and grey scale, external width, fibroblast and tenocyte number, increased capillary density                                         |

**Table S2: effects of the exposure of connective tissue to extracorporeal shock waves**

| Reference No. | Author          | Year | Study type        | Utilized device                                                                        | Cell type investigated               | Morphological, functional, radiological findings                                                                          | Findings of molecularbiological examinations | Findings of histological examinations                                                                                                                                                                 |
|---------------|-----------------|------|-------------------|----------------------------------------------------------------------------------------|--------------------------------------|---------------------------------------------------------------------------------------------------------------------------|----------------------------------------------|-------------------------------------------------------------------------------------------------------------------------------------------------------------------------------------------------------|
| [147]         | Wang et al.     | 2005 | Animal experiment | Ossatron (HMT High Medical Technologies GmbH, Kreuzlingen, Switzerland)                | Rabbit tendon-bone interface healing | Increased trabecular bone around the tendons and tensile strength of tendon/bone-interface, better bone/tendon contacting |                                              |                                                                                                                                                                                                       |
| [148]         | Chen et al.     | 2004 | Animal experiment | HMT High Medical Technologies GmbH, Kreuzlingen, Switzerland                           | Rat Achilles tendinitis              | Increased load to failure                                                                                                 |                                              | Decreased edema, swelling, inflammatory cell infiltration; increased expression of TGF- $\beta$ , IGF-I, tenocyte proliferation, neovascularization and <u>progressive tendon tissue regeneration</u> |
| [149]         | Orhan et al.    | 2004 | Animal experiment | Breakstone 200 Lithotripter System (Breakthrough Medical Corp, Gaithersburg, Maryland) | Rat Achilles tendon injury           | Higher force to rupture                                                                                                   |                                              | Less adhesion formation, increased number of capillaries                                                                                                                                              |
| [150]         | Hsu et al.      | 2004 | Animal experiment | Orthospec, Medispec, Israel                                                            | Rabbit patellar tendinopathy         | Increased ultimate tensile load                                                                                           |                                              | Increased hydroxyproline concentration; decreased pyridinoline concentration; unaltered number of blast-like tenocytes (4 weeks); increased number of mature tenocytes (16 weeks)                     |
| [151]         | Orhan et al.    | 2004 | Animal experiment | mobile ELMED lithotripter, 2001, Ankara, Turkey                                        | Rat healthy Achilles tendon          |                                                                                                                           |                                              | Disorganisation of collagen fibers                                                                                                                                                                    |
| [152]         | Wang et al.     | 2003 | Animal experiment | not specified                                                                          | Rabbit Achilles tendon-bone junction |                                                                                                                           |                                              | Increased number of neo-vessels and expression of eNOS, VEGF and PCNA                                                                                                                                 |
| [153]         | Maier et al.    | 2002 | Animal experiment | EPOS Ultra, Domier MedTech, Wessling, Germany                                          | Rabbit Quadriceps tendon             |                                                                                                                           |                                              | High intensities:<br>tendon: increased staining affinity, nuclear and fibrillar appearance<br>paratendon: increased thickness, edema, capillary density                                               |
| [154]         | Wang et al.     | 2002 | Animal experiment | Ossatron (HMT High Medical Technologies GmbH, Kreuzlingen, Switzerland)                | Dog Achilles tendon bone junction    |                                                                                                                           |                                              | New capillary and muscularized vessels, newly appeared myofibroblasts; no alterations in bone matrix, <u>bone vascularization and osteocyte activity</u>                                              |
| [155]         | Johannes et al. | 1994 | Cell culture      | Osteostar (Siemens, Erlangen, Germany)                                                 | Human fibroblasts                    |                                                                                                                           |                                              | Decreased cell viability, no alterations in cell growth                                                                                                                                               |

**Table S3: effects of the exposure of muscle and nerve tissue to extracorporeal shock waves**

| Reference No. | Author                | Year | Study type                               | Utilized device                                                                                        | Cell type investigated                                                | Morphological, functional, electrophysiological findings                                                                      | Findings of molecularbiological examinations                                                                                                                                                                                       | Findings of histological examinations                                                                                                                                                              |
|---------------|-----------------------|------|------------------------------------------|--------------------------------------------------------------------------------------------------------|-----------------------------------------------------------------------|-------------------------------------------------------------------------------------------------------------------------------|------------------------------------------------------------------------------------------------------------------------------------------------------------------------------------------------------------------------------------|----------------------------------------------------------------------------------------------------------------------------------------------------------------------------------------------------|
| [156]         | Huang et al.          | 2021 | Animal experiment                        | Swiss Dolorclast® (Electro Medical Systems SA, Switzerland)                                            | Rabbit immobilization-induced fibrosis and contracture of muscle      | Decreased total contracture angle, muscle contracture angle                                                                   | Decreased expression of TGFβ, HIF1α                                                                                                                                                                                                | Decreased proportion of collagen fiber area                                                                                                                                                        |
| [157]         | Kenmoku et al.        | 2021 | Animal experiment                        | Swiss Dolorclast® (Electro Medical Systems SA, Switzerland)                                            | Neuromuscular junction in rats                                        | Energy flux density- and total energy-dependent decrease of CMAP, unaltered CMAP latency                                      |                                                                                                                                                                                                                                    |                                                                                                                                                                                                    |
| [158]         | Park et al.           | 2020 | Animal experiment                        | Dornier MedTech, Wessling, Germany                                                                     | Rat sciatic nerve crush model                                         | Increased print width, print area                                                                                             | Tendential increased expression of myelin basic protein                                                                                                                                                                            |                                                                                                                                                                                                    |
| [159]         | Matsuda et al.        | 2020 | Animal experiment                        | Duolith®SD1 (Storz Medical AG, Trärgewilen, Switzerland)                                               | Spinal cord contusion injury model in rats                            | Improved BBB locomotor function, increased withdrawal threshold, abbreviated latency of MEPs, no alterations in MEP amplitude | Increased expression of BDNF and TrkB                                                                                                                                                                                              | Increased expression of BDNF, reduced myelin damage and oligodendrocyte loss, decreased axonal damage                                                                                              |
| [160]         | Langendorf et al.     | 2020 | Animal experiment                        | Swiss Dolorclast® (Electro Medical Systems SA, Switzerland)                                            | Rat musculus rectus femoris grade III muscle tear                     |                                                                                                                               | Increased expression of MyoD and myosin                                                                                                                                                                                            | First higher amount of mononucleated cells, at day 7 newly formed muscle fibers with less MNCs; unaltered number of CD31-pos. cells                                                                |
| [161]         | Sagir et al.          | 2019 | Animal experiment                        | OE050 focused applicator, Orthogold 100, MTS, Konstanz, Germany                                        | Rat peripheral nerve injury                                           | Decreased EMG amplitude, increased EMG latency, improved sciatic functional index                                             |                                                                                                                                                                                                                                    | Decreased Myelin thickness, axon area and number                                                                                                                                                   |
| [162]         | Feichtinger et al.    | 2019 | Animal experiment                        | Dermagold; TissueRegeneration Technologies, Woodstock, Georgia, manufactured by MTS, Konstanz, Germany | Rat rotator cuff reconstruction                                       | Improved load-to-failure testing results, intensity measurements in functional gait analysis                                  | Unaltered expression of CXCL12, TGF-β1, TGF-β3, VEGFR2                                                                                                                                                                             |                                                                                                                                                                                                    |
| [163]         | Yang et al.           | 2019 | Animal experiment                        | not specified                                                                                          | Neuropathic pain // rat L4/5 dorsal root ganglions and sciatic nerve  | Improved mechanical paw withdrawal treshold and thermal paw withdrawal latency                                                | Decreased TNF-α, NF-κB, MMP-9, IL-1β, NOX-1, NOX-2, NOX-4, oxidized protein, cleaved caspase 3, cleaved PARP, γ-H2AX, (p)-p38, p-JNK, p-ERK1/2, Nav 1.3, Nav 1.8 and Nav 1.9                                                       | Dose-dependent increase of Myf5, MyoD, Pax7, NCAM; down-regulation of these proteins at double exposure of the highest energy flux density                                                         |
| [164]         | Mattyaszovszky et al. | 2018 | Primary cell culture                     | Swiss Dolorclast® (Electro Medical Systems SA, Switzerland)                                            | Human sceletal muscle cells                                           |                                                                                                                               |                                                                                                                                                                                                                                    | Increased cell viability at low energy flux densities, no alterations at higher energy flux densities                                                                                              |
| [165]         | Yin et al.            | 2018 | Animal experiment                        | Cardiospec, Medispec, Israel                                                                           | Rat limb ischemia-reperfusion injury of quatriceps muscle             | Increased angiogenesis, decreased serum myoglobin/creatinine phosphokinase                                                    | Decreased NOX-1, NOX-2, cleaved caspase 3, cleaved PARP, TGF-β, (p)-Smad3, ICAM-1, MMP-9, TNF-α, NF-κB, RANTES, TLR-2, TLR-4, IL-1β, cytosolic cytochrome C, γ-H2AX; increased Bcl-2, p-Smad1/5, BMP-2, mitochondrial cytochrome C | Decreased muscle-damaged/fibrosis/collagen-deposition areas                                                                                                                                        |
| [166]         | Shin et al.           | 2018 | Animal experiment                        | Swiss Dolorclast® (Electro Medical Systems SA, Switzerland)                                            | Rat chronic contusive SCI model                                       |                                                                                                                               | Increased expression of DCX, SOX-2, GAP-43, MAP-2                                                                                                                                                                                  | Increased expression of DCX, SOX-2, GAP-43, MAP-2                                                                                                                                                  |
| [167]         | Luh et al.            | 2018 | Animal experiment                        | Piezoson 100, Richard Wolf, Knittlingen, Germany                                                       | Rat caudal nerves anaesthetic drug delivery                           |                                                                                                                               |                                                                                                                                                                                                                                    |                                                                                                                                                                                                    |
| [168]         | Kenmoku et al.        | 2018 | Animal experiment                        | Swiss Dolorclast® (Electro Medical Systems SA, Switzerland)                                            | Rat neuromuscular junction                                            | Decreased CMAP amplitude, unaltered CMAP latency                                                                              |                                                                                                                                                                                                                                    | Irregular end plates, unchanged axon terminals and muscle fibers, increased mean interjunctional fold interval                                                                                     |
| [169]         | Chen et al.           | 2017 | Animal experiment                        | not specified                                                                                          | Neuropathic pain // rat L4/5 dorsal root ganglions and sciatic nerve  | Improved mechanical paw withdrawal treshold and thermal paw withdrawal latency                                                | Decreased expression of TNF-α, NF-κB, MMP-9, IL-1β, GFAP, ox42, NOX-1, NOX-2, NOX-4, oxidized protein, γ-H2AX, cytosolic mitochondria, cleaved capase-3, PARP, p-P38, p-JNK, p-ERK1/2, Nav 1.3, Nav 1.8, Nav 1.9                   | Decreased expression of p-P38+, peripherin+ cells, P38+, NF200+ cells                                                                                                                              |
| [170]         | Yahata et al.         | 2016 | Animal experiment                        | Duolith®SD1 (Storz Medical AG, Trärgewilen, Switzerland)                                               | Rat SCI model                                                         | Improved BBB locomotor score, withdrawal latency, 50% withdrawal threshold                                                    |                                                                                                                                                                                                                                    | Increased expression of VEGF, CD31, α-SMA, 5-HT, increased area of spared white matter, decreased number of TUNEL-pos. cells                                                                       |
| [171]         | Schuh et al.          | 2016 | Primary cell culture                     | Dermagold 100, Tissue Regeneration Technologies, Woodstock, GA, manufactured by MTS, Konstanz, Germany | Schwann cells of rats peripheral nerves (sciatic nerves)              |                                                                                                                               | Increased cell yield, BrdU assays, population doublings, S100b, c-Jun, GFAP, and P75 expression, decreased P0 and P16 expression, increased extracellular ATP levels immediately after application                                 |                                                                                                                                                                                                    |
| [172]         | Lee                   | 2016 | Animal experiment                        | HAEMIL, Soltar, Korea                                                                                  | Locomotion in a rats CNS injury model                                 | Decreased knee joint angle                                                                                                    |                                                                                                                                                                                                                                    |                                                                                                                                                                                                    |
| [173]         | Kisch et al.          | 2016 | Animal experiment                        | Duolith®SD1 (Storz Medical AG, Trärgewilen, Switzerland)                                               | Rat hind limb muscle                                                  | Increased muscular blood flow                                                                                                 |                                                                                                                                                                                                                                    |                                                                                                                                                                                                    |
| [174]         | Lee & Kim             | 2015 | Animal experiment                        | HAEMIL, Soltar, Seoul, Korea                                                                           | Rat sciatic nerve injury                                              | Increased ankle angles (toe off + foot contact), improved Sciatic functional index                                            | Increased expression of NT-3                                                                                                                                                                                                       |                                                                                                                                                                                                    |
| [175]         | Yamaya et al.         | 2014 | Animal experiment                        | Duolith®SD1 (Storz Medical AG, Trärgewilen, Switzerland)                                               | Rat SCI model                                                         | Improved BBB locomotor score                                                                                                  | Increased expression of VEGF and Flt-1                                                                                                                                                                                             | Increased NeuN-positive cells, VEGF staining                                                                                                                                                       |
| [176]         | Fu et al.             | 2014 | Animal experiment                        | Storz Masterpuls MP100 (STORZ, Germany)                                                                | Neuropathic pain / rat chronic constriction injury                    | Improved mechanical withdrawal threshold, thermal withdrawal latency                                                          |                                                                                                                                                                                                                                    |                                                                                                                                                                                                    |
| [177]         | Ishikawa et al.       | 2013 | Animal experiment                        | Swiss Dolorclast® (Electro Medical Systems SA, Switzerland)                                            | Rat CCI hind limb muscle                                              | Transfection of POMC gene                                                                                                     |                                                                                                                                                                                                                                    |                                                                                                                                                                                                    |
| [178]         | Mense & Hoheisel      | 2013 | Animal experiment                        | Duolith®SD1 (Storz Medical AG, Trärgewilen, Switzerland)                                               | Rat distal sciatic nerve injury (Gastrocnemius-Soleus or Sural Nerve) | Decreased pressure pain threshold, improved locomotor activity                                                                |                                                                                                                                                                                                                                    | Increased number of PGP 9.5 IR nerve fibers                                                                                                                                                        |
| [179]         | Hausner et al.        | 2012 | Animal experiment                        | Orthowave 180 shockwave machine (MTS Europe, Switzerland)                                              | Rat sciatic nerve autograft                                           | Increased amplitude, CNAP area                                                                                                |                                                                                                                                                                                                                                    | Increased number of myelinated axons, unaltered number of endoneural vessels                                                                                                                       |
| [180]         | Kenmoku et al.        | 2012 | Animal experiment                        | Swiss Dolorclast® (Electro Medical Systems SA, Switzerland)                                            | Rat gastrocnemius muscle neuromuscular junction                       | Decreased amplitude, unaltered CMAP latency                                                                                   |                                                                                                                                                                                                                                    | Decreased number of acetylcholine receptors                                                                                                                                                        |
| [181]         | Yamashita et al.      | 2009 | Primary cell culture + animal experiment | not specified                                                                                          | POMC transfection in rat muscle cells                                 | Decreased mechanical allodynia                                                                                                |                                                                                                                                                                                                                                    | Increased ratio of β-endorphin-IR muscle cells and number of β-endorphin-IR muscle fibers; decreased number of CGRP-IR DRG neurons                                                                 |
| [182]         | Wu et al.             | 2008 | Animal experiment                        | Piezoson 100, Richard Wolf, Knittlingen, Germany                                                       | Rat sciatic nerve                                                     | Decreased motor nerve conduction velocity; unaltered Sciatic functional index and withdrawal reflex latency                   |                                                                                                                                                                                                                                    | Damage to the myelin sheath of large-diameter myelinated fibers                                                                                                                                    |
| [183]         | Hausdorf et al.       | 2008 | Animal experiment                        | XL 1 (Dornier MedTech, Wessling, Germany)                                                              | Rabbit distal femoral region                                          |                                                                                                                               |                                                                                                                                                                                                                                    | Decreased number of unmyelinated nerve fibers of femoral nerve; unaltered number of unmyelinated nerve fibers of sciatic nerve; unaltered size, number and myelin sheet of myelinated nerve fibers |
| [184]         | Hausdorf et al.       | 2008 | Animal experiment                        | XL 1 (Dornier MedTech, Wessling, Germany)                                                              | Rabbit distal femoral region // dorsal root ganglion                  |                                                                                                                               |                                                                                                                                                                                                                                    | Decreased number of neurons immunoreactive for substance P                                                                                                                                         |
| [185]         | Lee et al.            | 2007 | Animal experiment                        | Ossatron (HMT High Medical Technologies GmbH, Kreuzlingen, Switzerland)                                | Rabbit spinal cord                                                    | No changes in motor and vegetative functions                                                                                  |                                                                                                                                                                                                                                    | Decreased number of neurons at high intensity treatment (0.68mJ/mm2), dose-dependent myelin damage                                                                                                 |
| [186]         | Ochiai et al.         | 2007 | Animal experiment                        | Epos (Dornier MedTech, Wessling, Germany)                                                              | Rat knee osteoarthritis // dorsal root ganglion                       | Increased walking duration                                                                                                    |                                                                                                                                                                                                                                    | Decreased ratio of CGRP-positive dorsal root ganglion neurons                                                                                                                                      |
| [187]         | Wu et al.             | 2007 | Animal experiment                        | Piezoson 100, Richard Wolf, Knittlingen, Germany                                                       | Rat sciatic nerve                                                     | Decreased motor nerve conduction velocity, unaltered sciatic functional index                                                 |                                                                                                                                                                                                                                    |                                                                                                                                                                                                    |
| [188]         | Murata et al.         | 2006 | Animal experiment                        | Epos (Dornier MedTech, Wessling, Germany)                                                              | Rat foot pad // dorsal root ganglion                                  |                                                                                                                               |                                                                                                                                                                                                                                    | Increased number of ATF3 and ATF-3/GAP-43 dual-IR neurons                                                                                                                                          |



**Table S3: effects of the exposure of muscle and nerve tissue to extracorporeal shock waves**

| Reference No. | Author           | Year | Study type        | Utilized device                                                      | Cell type investigated               | Morphological, functional, electrophysiological findings | Findings of molecularbiological examinations                                                                                                            | Findings of histological examinations                                                                                  |
|---------------|------------------|------|-------------------|----------------------------------------------------------------------|--------------------------------------|----------------------------------------------------------|---------------------------------------------------------------------------------------------------------------------------------------------------------|------------------------------------------------------------------------------------------------------------------------|
| [189]         | Takahashi et al. | 2006 | Animal experiment | Epos (Dornier MedTech, Wessling, Germany)                            | Rat foot pad                         |                                                          |                                                                                                                                                         | Decreased number of epidermal nerve fibers                                                                             |
| [190]         | Bolt et al.      | 2004 | Animal experiment | Swiss DolorClast Vet, EMS Electro Medical Systems, Nyon, Switzerland | Horse digital palmar nerves          | Decreased sensory nerve conduction velocity              |                                                                                                                                                         | Disruption of myelin sheet                                                                                             |
| [191]         | Hausdorf et al.  | 2004 | Animal experiment | XL 1 (Dornier MedTech, Wessling, Germany)                            | Rabbit periosteum of distal femur    |                                                          | Increased Substance P release 6 and 24 hours after treatment, decreased Substance P release 6 weeks after treatment; unaltered Prostaglandine E release |                                                                                                                        |
| [192]         | Takahashi et al. | 2003 | Animal experiment | Epos (Dornier MedTech, Wessling, Germany)                            | Rat foot pad // dorsal root ganglion |                                                          |                                                                                                                                                         | Decreased percentage of CGRP-immunoreactive dorsal root ganglion neurons                                               |
| [193]         | Maier et al.     | 2003 | Animal experiment | XL 1 (Dornier MedTech, Wessling, Germany)                            | Rabbit distal femur                  |                                                          |                                                                                                                                                         | Increased Substance P release after 6 and 24 hours; decreased SP release after 6 weeks; no alterations in PGE2 release |
| [194]         | Haake et al.     | 2002 | Animal experiment | MINILITH SL1; Storz Medical, Kreuzlinger, Switzerland                | Rat hind paw // spinal chord         |                                                          | Unaltered c Fos expression                                                                                                                              | Unaltered c Fos expression                                                                                             |
| [195]         | Ohtori et al.    | 2002 | Animal experiment | Epos (Dornier MedTech, Wessling, Germany)                            | Rat hind paw epidermis               |                                                          |                                                                                                                                                         | Decreased number of nerve fibres immunoreactive for PGP 9.5 and CGRP                                                   |
| [196]         | Haake et al.     | 2001 | Animal experiment | MINILITH SL1; Storz Medical, Kreuzlinger, Switzerland                | Rat hind paw // spinal chord         |                                                          |                                                                                                                                                         | Unaltered expression of met-enkephalin (MRGL) and dynorphin (Dyn)                                                      |
| [197]         | Rompe et al.     | 1998 | Animal experiment | Osteostar (Siemens,Erlangen, Germany)                                | Rabbit sciatic nerve                 |                                                          |                                                                                                                                                         | Vacuolic swelling of the axons, no disruption of nerve's continuity                                                    |
